# Supplementary material for: Proximity to AGCT sequences dictates MMR-independent versus MMR-dependent mechanisms for AID-induced mutation via UNG2
Source: PubMed Central journal article supplement — Nucleic Acids Res. 2016 Dec 30;45(6):3146–57. doi: 10.1093/nar/gkw1300 (PMC5389528; doi:10.1093/nar/gkw1300), 2016-12-30

Supplementary Table 1

Supplementary to Table 1. Raw mutation numbers for each dataset.

| bases/sequence                                              | 523                 | 124        | 114        | 158        | 127        |
|-------------------------------------------------------------|---------------------|------------|------------|------------|------------|
| <b>MUTATION FROM:</b>                                       |                     |            |            |            |            |
| <b>UNG<sup>-</sup>M<sup>-</sup></b><br>10 mice<br>368 seq's | <b>MUTATION TO:</b> | <b>C</b>   | <b>G</b>   | <b>T</b>   | <b>A</b>   |
|                                                             | <b>C</b>            | 0          | 3          | 2          | 0          |
|                                                             | <b>G</b>            | 1          | 0          | 0          | 0          |
|                                                             | <b>T</b>            | 626        | 5          | 0          | 2          |
|                                                             | <b>A</b>            | 2          | 357        | 1          | 0          |
|                                                             | <b>999</b>          | <b>629</b> | <b>365</b> | <b>3</b>   | <b>2</b>   |
| <b>UNG<sup>+</sup>M<sup>-</sup></b><br>11 mice<br>514 seq's | <b>MUTATION TO:</b> | <b>C</b>   | <b>G</b>   | <b>T</b>   | <b>A</b>   |
|                                                             | <b>C</b>            | 0          | 43         | 2          | 1          |
|                                                             | <b>G</b>            | 8          | 0          | 0          | 5          |
|                                                             | <b>T</b>            | 257        | 17         | 0          | 9          |
|                                                             | <b>A</b>            | 6          | 179        | 0          | 0          |
|                                                             | <b>527</b>          | <b>271</b> | <b>239</b> | <b>2</b>   | <b>15</b>  |
| <b>UNG<sup>-</sup>M<sup>+</sup></b><br>11 mice<br>468 seq's | <b>MUTATION TO:</b> | <b>C</b>   | <b>G</b>   | <b>T</b>   | <b>A</b>   |
|                                                             | <b>C</b>            | 0          | 5          | 33         | 62         |
|                                                             | <b>G</b>            | 6          | 0          | 15         | 99         |
|                                                             | <b>T</b>            | 270        | 7          | 0          | 97         |
|                                                             | <b>A</b>            | 1          | 324        | 29         | 0          |
|                                                             | <b>948</b>          | <b>277</b> | <b>336</b> | <b>77</b>  | <b>258</b> |
| <b>UNG<sup>+</sup>M<sup>+</sup></b><br>11 mice<br>539 seq's | <b>MUTATION TO:</b> | <b>C</b>   | <b>G</b>   | <b>T</b>   | <b>A</b>   |
|                                                             | <b>C</b>            | 0          | 53         | 49         | 70         |
|                                                             | <b>G</b>            | 25         | 0          | 27         | 111        |
|                                                             | <b>T</b>            | 124        | 30         | 0          | 155        |
|                                                             | <b>A</b>            | 19         | 166        | 38         | 0          |
|                                                             | <b>867</b>          | <b>168</b> | <b>249</b> | <b>114</b> | <b>336</b> |

Supplementary Figure 1

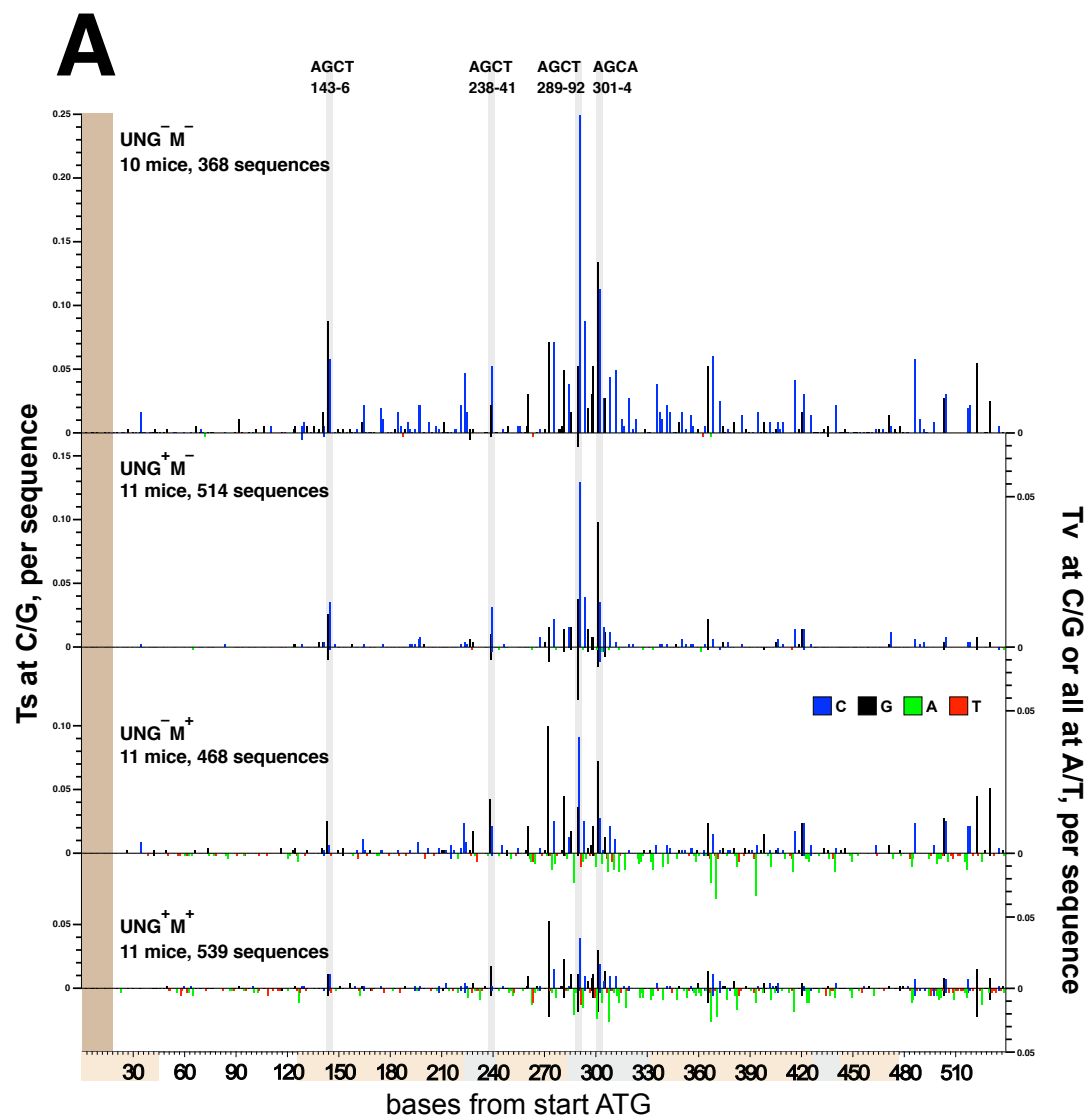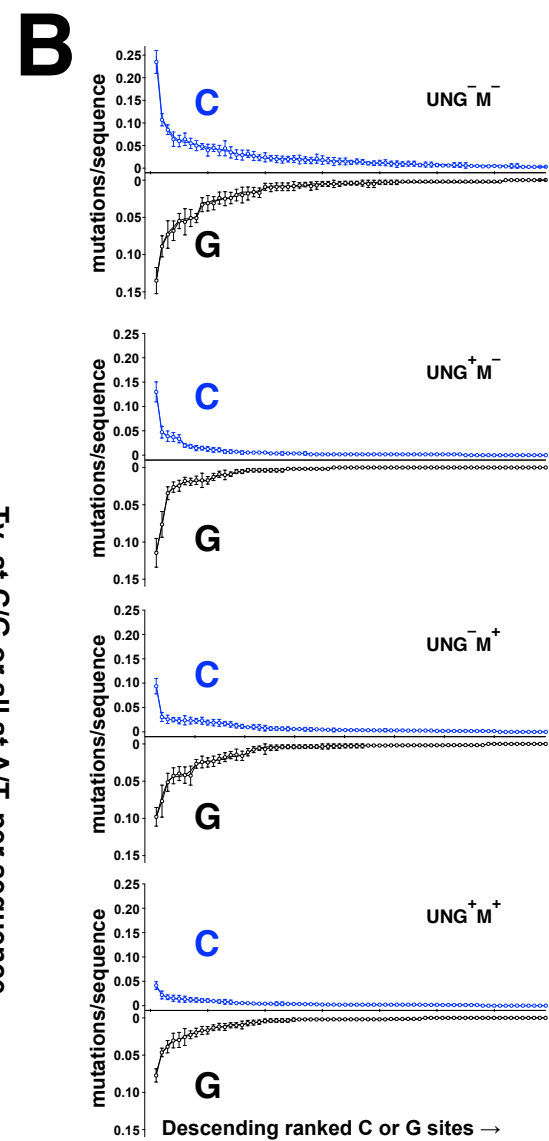

### Supplementary Figure 1 (previous page)

Supplementary to Figure 2. (A) Histograms of mutation frequencies at each base in the sequenced window of 523bp. Transitions at C (blue) or G (black) are shown above the x-axis. Transversions at C (blue) or G (black) and mutations at A (green) or T (red) are shown below the x-axis. The brown stripe indicates a 5' region in which mutations were not collated because it overlapped a secondary PCR primer. Grey dashed lines identify the four AGCW motifs present in the starting sequence (see Results and Discussion). Beige boxes at bottom indicate the L and VJ exons, while grey boxes indicate the three CDRs, according to IMGT (IMGT®, the international ImMunoGeneTics information system® <http://www.imgt.org> (founder and director: Marie-Paule Lefranc, Montpellier, France)). (B) Reproducibility of hotspot-targeting in the datasets. C (top, blue) or G (bottom, black) mutation sites were sorted as most to least mutated site (i.e. decendingly ranked) in each dataset. The variation between hosts in mean mutation at each sorted site is indicated by the error bars, which depict s.e.m.

### Supplementary Figure 2 (below)

Supplementary to Figure 5. Mutation skylines for cells over-expressing (A) UNG2 or UNG2-GFP, or (B) SMUG1 or SMUG1-GFP. Data are presented as in Supplementary Figure 1A.

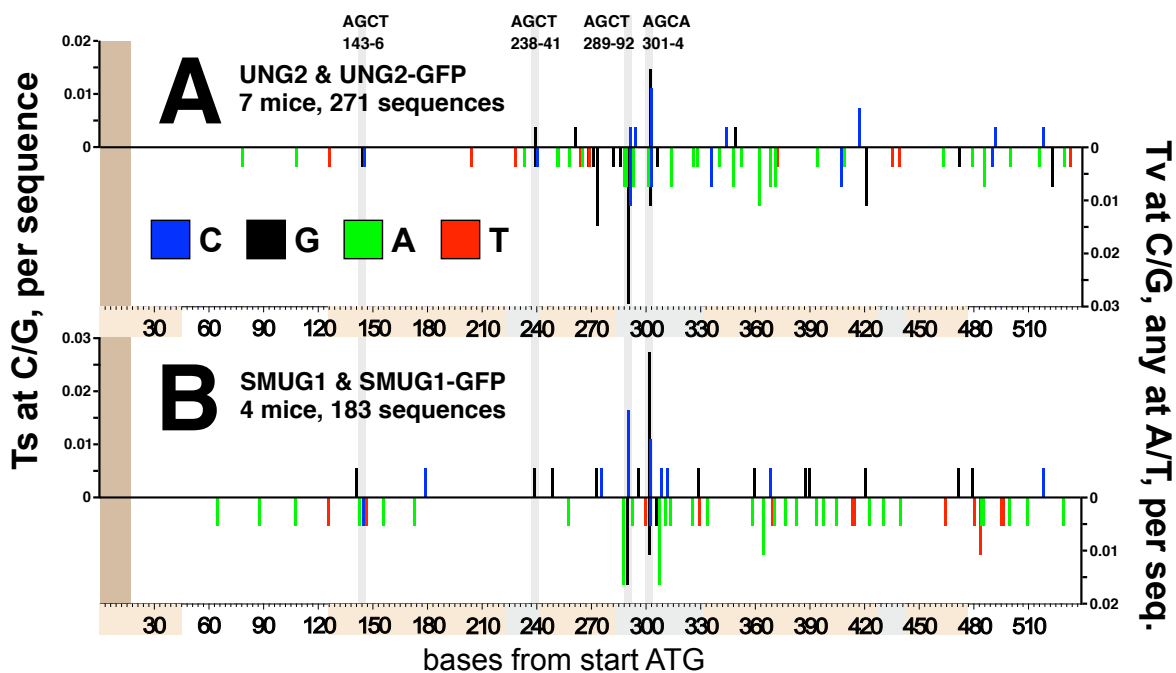

Supplement: gkw1300_Supp.pdf [file gkw1300_Supp.pdf]
